# Supplementary material for: Cell Wall Polysaccharide-Mediated Cadmium Tolerance Between Two Arabidopsis thaliana Ecotypes
Source: PubMed Central journal article supplement (PMC7239314; doi:10.3389/fpls.2020.00473), 2020-05-13
Supplement: Presentation_1.pdf [file Presentation_1.pdf]

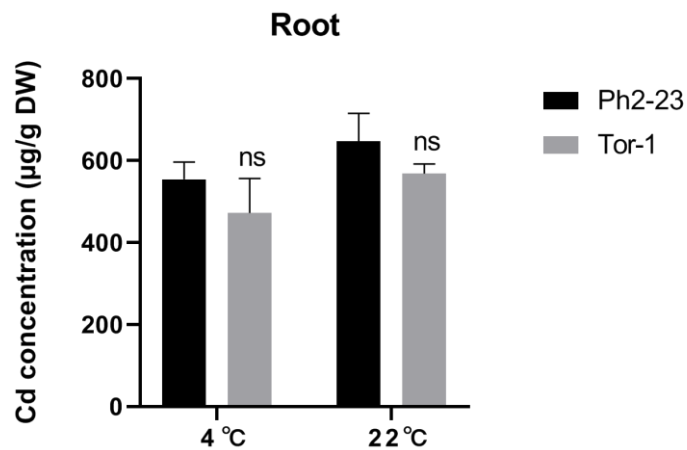

**Supplementary Figure 1.** Root Cd concentration in the two *Arabidopsis* ecotypes under 4°C and 22°C, with 10 µM CdCl<sub>2</sub> treatment for 30 min. Data are means ± SE (*n* = 4), and vertical bars indicate the SD, ns = differences are not significant.

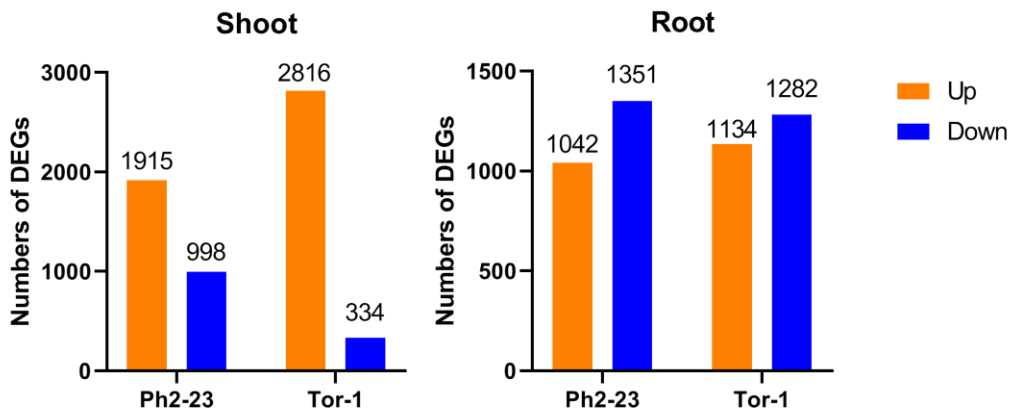

**Supplementary Figure 2.** Number of differentially expressed genes (DEGs) between Ph2-23 (cd vs ctl) and Tor-1 (cd vs ctl) in (A) shoot and (B) root, with three biological replications, the thresholds for selecting DEGs were  $|\log_2 FC| > 1$ , FDR < 0.05.

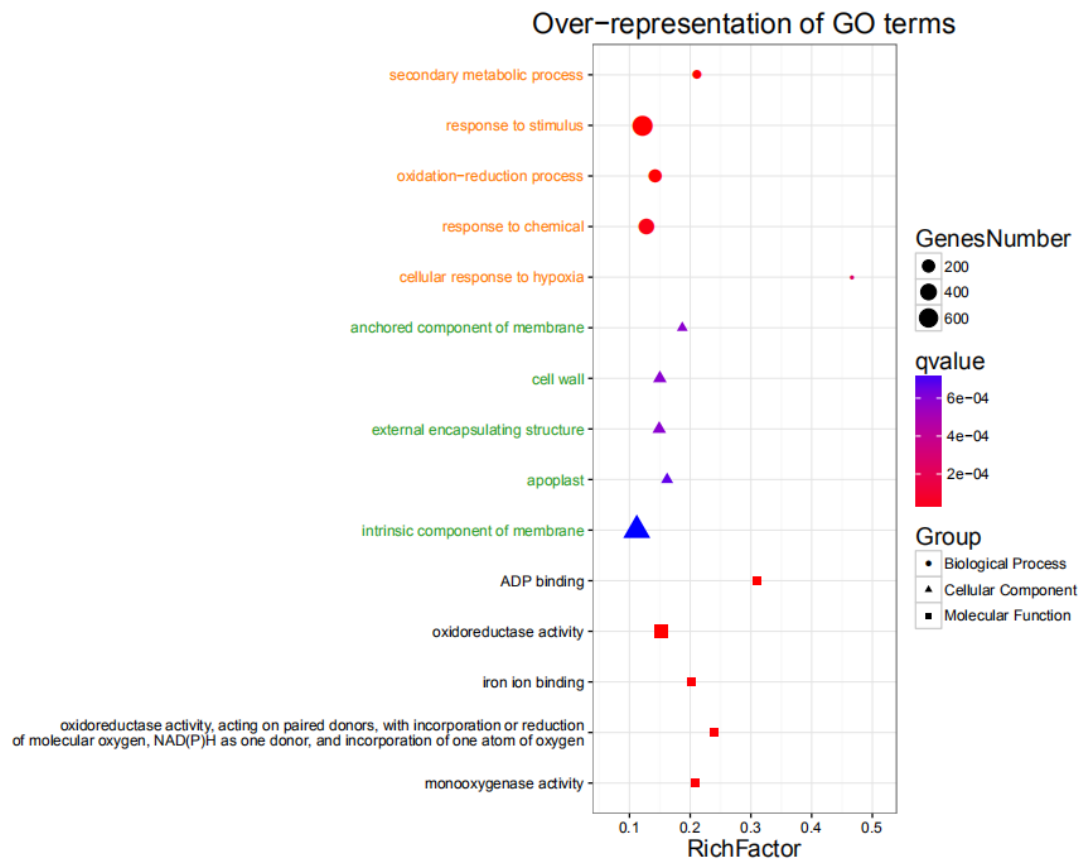

**Supplementary Figure 3.** Top 5 of go enrichment analysis (Tor-1-vs-Ph2-23). with three biological replications, the thresholds for selecting DEGs were  $|\log_2 FC| > 1$ ,  $FDR < 0.05$ .

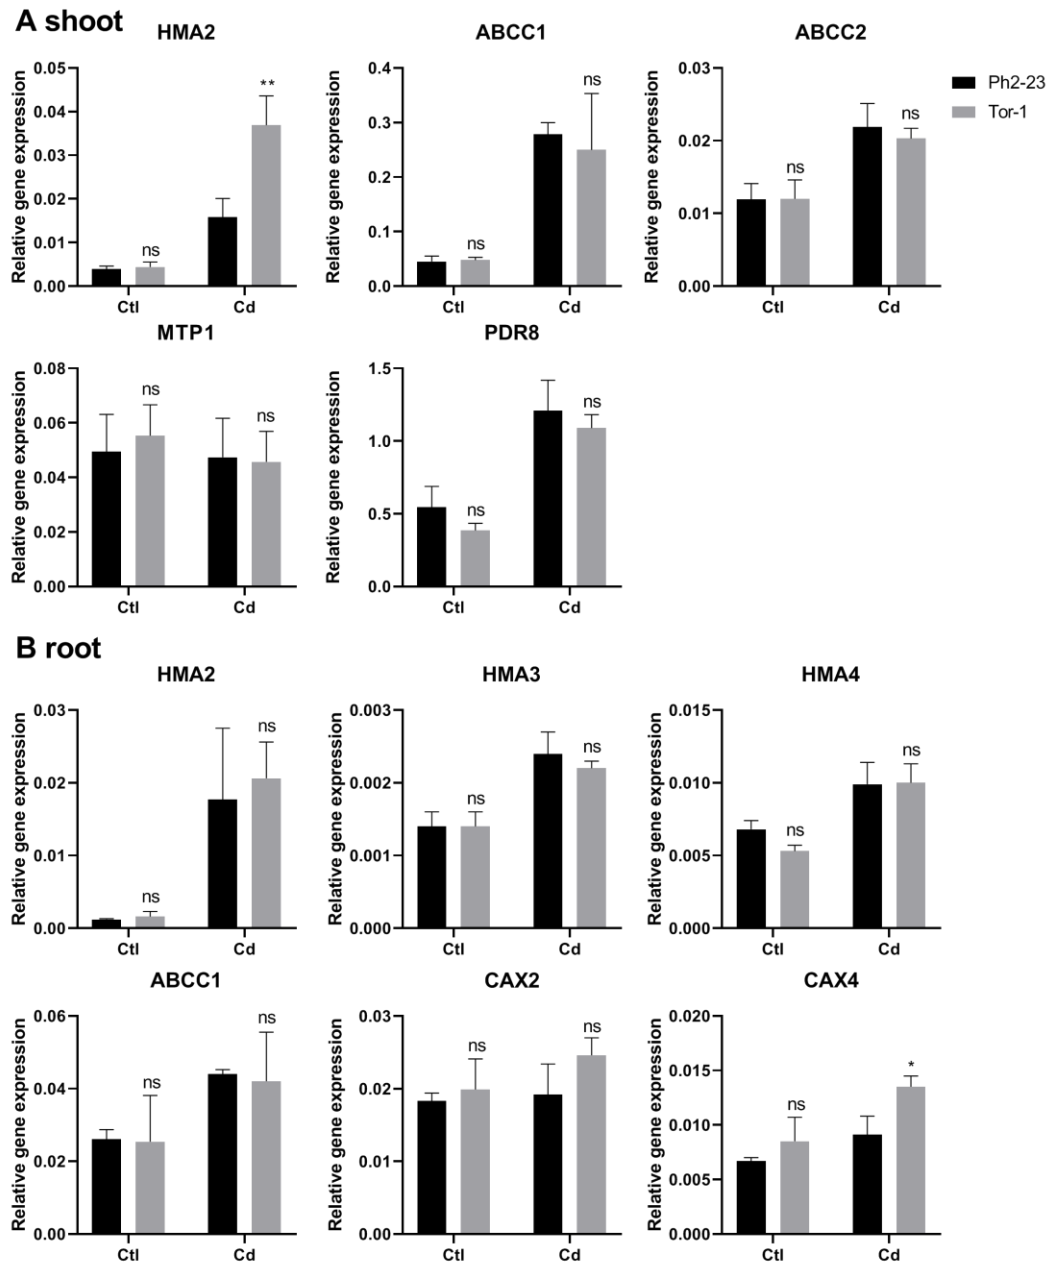

**Supplementary Figure 4.** qRT-PCR expression data of genes expression related to Cd transport in shoots (A) and roots (B) between Ph2-23 and Tor-1. Ctl means control treatment, with normal culture conditions; Cd, treatment with CdCl<sub>2</sub>. Data are means  $\pm$  SE ( $n = 4$ ), and vertical bars indicate the SD. \* and \*\* indicate significant differences from the control at  $P < 0.05$  and  $0.01$ , respectively; ns = differences are not significant.

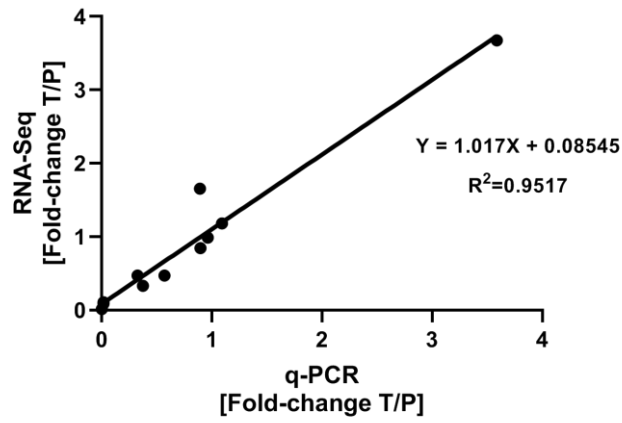

**Supplementary Figure 5.** Linear analysis between q-PCR and RNA-Seq results. T, Tor-1; P,Ph2-23.
