# Supplementary material for: Cell Wall Polysaccharide-Mediated Cadmium Tolerance Between Two Arabidopsis thaliana Ecotypes
Source: PubMed Central journal article supplement (PMC7239314; doi:10.3389/fpls.2020.00473), 2020-05-13
Supplement: Table_1.pdf [file Table_1.pdf]

**Table S1 Primers used for qRT-PCR analysis**

| Primer name | Sequence |                       | Tissue |
|-------------|----------|-----------------------|--------|
| XTH4        | XTH4-F   | CAATGGTAATGGCTATTCCTC | S      |
|             | XTH4-R   | CTGGTTGCCTGTTCTGTT    |        |
| XTH31       | XTH31-F  | TCAAGTCTCTTCGTCCATAC  | S      |
|             | XTH31-R  | GGTCTCCAGGATGCTCTT    |        |
| XTH33       | XTH33-F  | AAGCCACGACGAGATAGA    | S      |
|             | XTH33-R  | ACGGAACAGCCACTTAAC    |        |
| EXPA6       | EXPA6-F  | TTCTACGGTGGCTCTGAT    | S      |
|             | EXPA6-R  | TTAGTCGCAGTGATGAAGAT  |        |
| EXPA5       | EXPA5-F  | GCTTCTCGTGGTTCATCT    | S      |
|             | EXPA5-R  | CCGTCTCCAGTCCATAAC    |        |
| EXPA16      | EXPA16-F | GCCAAGGATACGGAACAA    | S      |
|             | EXPA16-R | ACCAACGAGAACAGCATTAA  |        |
| PDR8        | PDR8-F   | AGTGTCGCAGTACGGTGATG  | S      |
|             | PDR8-R   | CGCCACTGGTCCCATAAAGT  |        |
| ABCC1       | ABCC1-F  | TTTCTGTGCTTCGCTTCCCT  | S      |
|             | ABCC1-R  | GCTGTCCAGGTTCAATGGGA  |        |
| ABCC2       | ABCC2-F  | CTCGAGGGGAAACACGACAA  | S      |
|             | ABCC2-R  | CACTGCAAGCCCTTCTACCA  |        |
| MTP1        | MTP1-F   | GCACACTTGCCTTTTCGGTT  | S      |
|             | MTP1-R   | CCCTTTTCGAGCTTTGTGGC  |        |
| PAE4        | PAE4-F   | TATCCCCTCCGTTGACCGTA  | S      |
|             | PAE4-R   | CCGCCTCCACCCTCTAAATA  |        |
| CSLG3       | CSLG3-F  | AGAGTACCACGATGGAGCCT  | S      |

|        |          |                       |     |
|--------|----------|-----------------------|-----|
|        | CSLG3-R  | GTACGGATCAGCCGTGCATA  |     |
| PME17  | PME17-F  | TGAAAGCATGGTGCAGCCAAA | S   |
|        | PME17-R  | GTCACGGCACTTTGGTCCTA  |     |
| PME110 | PME110-F | CACCCTCTCATCCGCCAAAT  | S   |
|        | PME110-R | TGAAGCGAAGTCACCGAGTC  |     |
| PME112 | PME112-F | GTTTCGCAACCGCTCAAACCT | S   |
|        | PME112-R | CGGTCTTCGTCGATGCTAGG  |     |
| CAX2   | CAX2-F   | TCCATGTTTGCGGTCCCATT  | R   |
|        | CAX2-R   | CAGTGATGAACAGCATCGCC  |     |
| CAX4   | CAX4-F   | ACCGCTTGTTTTGCCTTGTC  | R   |
|        | CAX4-R   | GGTTTCGGTTGAGGGTGAGT  |     |
| HMA2   | HMA2-F   | CGAGGTGCAAGTGCAACAAA  | S/R |
|        | HMA2-R   | GTTCCAATGTCCAGGCCAGA  |     |
| HMA3   | HMA3-F   | GATGGCGGAAGGTGAAGAGT  | R   |
|        | HMA3-R   | GTGGACAACGATGACGGTTC  |     |
| HMA4   | HMA4-F   | TAAGCCAGTTCGCCGACTTT  | R   |
|        | HMA4-R   | TTCTCCTTGTCGTTTCGCCA  |     |
| Actin  | Actin-F  | GATGAGGATGATGCTTCTACG | S/R |
|        | Actin-R  | CCTGAGCGTTGTATCTTGGT  |     |
